# Supplementary material for: Degradation of brown adipocyte purine nucleotides regulates uncoupling protein 1 activity
Source: PubMed Central journal article supplement — Mol Metab. 2017 Dec 26;8:77–85. doi: 10.1016/j.molmet.2017.12.010 (PMC5985227; doi:10.1016/j.molmet.2017.12.010), 2017-12-26
Supplement: mmc1.pdf [file mmc1.pdf]

## 1 Supplemental Methods

### 2 Quantification of nucleotides

3 Clear supernatants were analyzed by means of LC-MS/MS with a 4000 QTrap (AB Sciex, Darmstadt,  
4 Germany) and a Dionex UHPLC UltiMate 3000 (Thermo Fisher) or Prominence HPLC (Shimadzu,  
5 Germany). The cell pellet was used for the quantitation of free fatty acids (see below).  
6 For chromatographic separation of nucleotides, a ZIC pHILIC 5  $\mu$ M, 150 x 4.6 mm (Merck) was used with  
7 acetonitrile/water with 5 mM ammonium acetate (95/5, v/v, pH 9.5) as solvent A and 5mM ammonium  
8 acetate (pH 9.5) as solvent B. The separation of nucleotides was performed using a 500  $\mu$ L/min  
9 flowrate and a linear gradient from 85% A which was maintained for 5 min to 50% A in 15 min.  
10 Afterward the column was flushed and equilibrated to starting conditions. Ions were analyzed by MS  
11 in the negative mode. The spray voltage was set to -4500 V at a source temperature of 450°C and using  
12 nitrogen as collision gas. The parameters for the collision activated dissociation (CAD) were: -2, curtain  
13 gas: 35 psi, ion source gas 1: 55 psi, ion source gas 2: 65 psi, entrance potential (EP) -10 V. The MRM  
14 (multiple reaction monitoring) transition for each compound are listed in Table S1. The first MRM-  
15 transition was used as quantifier the second as qualifier.

16

17 *Table S1: MRM-transitions for quantitation of nucleotides.*

| Compound  | Quantifier/<br>Qualifier         | Q <sub>1</sub><br>(m/z) | Q <sub>3</sub><br>(m/z) | Dwell<br>Time<br>(msec) | Decustering<br>potential (V) | Collision<br>Energy<br>(V) | Cell Exit<br>Potential<br>(V) |
|-----------|----------------------------------|-------------------------|-------------------------|-------------------------|------------------------------|----------------------------|-------------------------------|
| ATP       | Quantifier<br>[M-H] <sup>-</sup> | 506.01                  | 79.0                    | 30                      | -70                          | -106                       | -7                            |
|           | Qualifier<br>[M-H] <sup>-</sup>  | 506.01                  | 158.9                   | 30                      | -70                          | -50                        |                               |
| AMP       | Quantifier<br>[M-H] <sup>-</sup> | 346.02                  | 78.9                    | 30                      | -60                          | -56                        | -1                            |
|           | Qualifier<br>[M-H] <sup>-</sup>  | 346.02                  | 97.1                    | 30                      | -60                          | -36                        | -5                            |
| ADP       | Quantifier<br>[M-H] <sup>-</sup> | 426.21                  | 78.8                    | 30                      | -50                          | -98                        | -1                            |
|           | Qualifier<br>[M-H] <sup>-</sup>  | 426.21                  | 133.9                   | 30                      | -50                          | -36                        | -7                            |
| IMP       | Quantifier<br>[M-H] <sup>-</sup> | 347.03                  | 78.9                    | 30                      | -50                          | -66                        | -1                            |
|           | Qualifier<br>[M-H] <sup>-</sup>  | 347.03                  | 96.9                    | 30                      | -50                          | -34                        | -5                            |
| Adenosin  | Quantifier<br>[M-H] <sup>-</sup> | 266.07                  | 133.9                   | 30                      | -35                          | -16                        | -1                            |
|           | Qualifier<br>[M-H] <sup>-</sup>  | 266.07                  | 106.8                   | 30                      | -35                          | -52                        | -7                            |
| Guanosine | Quantifier<br>[M-H] <sup>-</sup> | 282.05                  | 150.0                   | 30                      | -60                          | -26                        | -7                            |
|           | Qualifier<br>[M-H] <sup>-</sup>  | 282.05                  | 132.9                   | 30                      | -60                          | -44                        | -7                            |

|                          |                                 |        |       |    |     |      |     |
|--------------------------|---------------------------------|--------|-------|----|-----|------|-----|
|                          | [M-H] <sup>-</sup>              |        |       |    |     |      |     |
| GMP                      | Quantifier                      | 362.07 | 78.8  | 30 | -45 | -60  | -1  |
|                          | [M-H] <sup>-</sup><br>Qualifier | 362.07 | 210.9 | 30 | -45 | -26  | -3  |
| GDP                      | Quantifier                      | 442.07 | 78.9  | 30 | -50 | -80  | -1  |
|                          | [M-H] <sup>-</sup><br>Qualifier | 442.07 | 149.9 | 30 | -50 | -36  | -1  |
| GTP                      | Quantifier                      | 522.02 | 78.9  | 30 | -80 | -118 | -1  |
|                          | [M-H] <sup>-</sup><br>Qualifier | 522.02 | 158.7 | 30 | -80 | -48  | -1  |
| Guanin                   | Quantifier                      | 149.96 | 132.9 | 30 | -45 | -20  | -9  |
|                          | [M-H] <sup>-</sup><br>Qualifier | 149.96 | 65.9  | 30 | -45 | -42  | -3  |
| Adenin                   | Quantifier                      | 134.05 | 106.9 | 30 | -60 | -24  | -5  |
|                          | [M-H] <sup>-</sup><br>Qualifier | 134.05 | 92    | 30 | -60 | -28  | -5  |
| Hypoxanthin              | Quantifier                      | 134.97 | 91.8  | 30 | -45 | -24  | -11 |
|                          | [M-H] <sup>-</sup><br>Qualifier | 134.97 | 64.8  | 30 | -45 | -40  | -3  |
| Xanthin                  | Quantifier                      | 151.00 | 107.9 | 30 | -55 | -24  | -7  |
|                          | [M-H] <sup>-</sup><br>Qualifier | 151.00 | 65.8  | 30 | -55 | -46  | -3  |
| Inosin                   | Quantifier                      | 267.04 | 135   | 30 | -70 | -30  | -5  |
|                          | [M-H] <sup>-</sup><br>Qualifier | 267.04 | 107.9 | 30 | -70 | -56  | -4  |
| <sup>15</sup> N-AMP      | IS<br>[M-H] <sup>-</sup>        | 350.9  | 79.0  | 30 | -60 | -56  | -1  |
| <sup>15</sup> N-ATP      | IS<br>[M-H] <sup>-</sup>        | 511.02 | 78.8  | 30 | -70 | -106 | -3  |
| <sup>15</sup> N-GMP      | IS<br>[M-H] <sup>-</sup>        | 367.02 | 78.8  | 30 | -45 | -60  | -1  |
| <sup>15</sup> N-GTP      | IS<br>[M-H] <sup>-</sup>        | 527.00 | 78.9  | 30 | -80 | -118 | -1  |
| <sup>13</sup> C-Adenosin | IS<br>[M-H] <sup>-</sup>        | 271.06 | 133.9 | 30 | -35 | -16  | -1  |

18

19

20

21

22

## 23 Quantification of free fatty acids

24 The cell pellets were extracted with 1 mL acetonitrile/isopropanol/ammonium acetate buffer (55/45/5, v/v/v)  
 25 and 50  $\mu$ L of internal standard solution. After vortexing, the samples were incubated overnight and centrifuged.  
 26 The supernatant was dried under a nitrogen stream and dissolved in 50  $\mu$ L of extraction solution. Samples were  
 27 subjected to LC-MS/MS using the setup above. Separation was performed using a 100 x 2.0 mm inner diameter,  
 28 2.5  $\mu$ m Synergi Polar-RP 100 A column (Phenomenex, Aschaffenburg, Germany) with a 400  $\mu$ L/min flowrate and  
 29 a linear gradient from 50% A (A: acetonitrile/isopropanol/water with 5 mM ammonia acetate (55/40/5, v/v/v,  
 30 pH 5), B: 5 mM ammonia acetate (pH 5)) for 3 min to 100% A in 9 min which was maintained for 3 min. Afterward  
 31 the column was equilibrated to starting conditions. Ions were analyzed by MS in the ESI negative mode. The ion  
 32 spray voltage was set to -4500 V at a source temperature of 550°C and using nitrogen as collision gas. The  
 33 parameters for the collision activated dissociation (CAD) were: medium, curtain gas: 25 psi, ion source gas 1: 55  
 34 psi, ion source gas 2: 65, entrance potential (EP) -10 V. The MRM (multiple reaction monitoring) transition for  
 35 each compound are listed in Table S2. The first MRM-transition was used as quantifier the second as qualifier.

36 *Table S2: MRM-transitions for quantitation of fatty acids.*

| Compound | Quantifier/<br>Qualifier         | Q <sub>1</sub> (m/z) | Q <sub>3</sub> (m/z) | Dwell<br>Time<br>(msec) | Declustering<br>Potential (DP) | Collision<br>Energy (CE) | Cell Exit<br>Potential<br>(CXP) |
|----------|----------------------------------|----------------------|----------------------|-------------------------|--------------------------------|--------------------------|---------------------------------|
| C12:0    | Quantifier<br>[M-H] <sup>-</sup> | 199.2                | 199.1                | 10                      | -70                            | -14                      | -1                              |
|          | Qualifier<br>[M-H] <sup>-</sup>  | 199.1                | 154.9                | 10                      | -70                            | -16                      | -11                             |
| C14:0    | Quantifier<br>[M-H] <sup>-</sup> | 227.2                | 227.1                | 10                      | -85                            | -12                      | -15                             |
|          | Qualifier<br>[M-H] <sup>-</sup>  | 227.2                | 138.8                | 10                      | -85                            | -20                      | -9                              |
| C15:0    | Quantifier<br>[M-H] <sup>-</sup> | 241.2                | 241.1                | 10                      | -80                            | -12                      | -15                             |
|          | Qualifier<br>[M-H] <sup>-</sup>  | 241.2                | 197.0                | 10                      | -80                            | -20                      | -11                             |
| C16:0    | Quantifier<br>[M-H] <sup>-</sup> | 255.3                | 255.0                | 10                      | -80                            | -30                      | -9                              |
|          | Qualifier<br>[M-H] <sup>-</sup>  | 255.3                | 166.7                | 10                      | -80                            | -26                      | -9                              |
| C16:1    | Quantifier<br>[M-H] <sup>-</sup> | 253.3                | 253.0                | 10                      | -85                            | -14                      | -17                             |
|          | Qualifier<br>[M-H] <sup>-</sup>  | 253.3                | 208.9                | 10                      | -85                            | -34                      | -17                             |
| C18:0    | Quantifier<br>[M-H] <sup>-</sup> | 283.2                | 283.2                | 20                      | -60                            | -12                      | -13                             |
|          | Qualifier<br>[M-H] <sup>-</sup>  | 283.1                | 283.1                | 20                      | -60                            | -22                      | -13                             |
| C18:1    | Quantifier<br>[M-H] <sup>-</sup> | 281.4                | 281.1                | 10                      | -100                           | -14                      | -17                             |
|          | Qualifier<br>[M-H] <sup>-</sup>  | 281.4                | 96.8                 | 10                      | -100                           | -38                      | -15                             |
| C18:2    | Quantifier<br>[M-H] <sup>-</sup> | 279.4                | 279.1                | 10                      | -85                            | -14                      | -7                              |
|          | Qualifier<br>[M-H] <sup>-</sup>  | 279.4                | 96.7                 | 10                      | -85                            | -36                      | -7                              |
| C18:3    | Quantifier<br>[M-H] <sup>-</sup> | 277.4                | 277.3                | 10                      | -80                            | -14                      | -7                              |
|          | Qualifier<br>[M-H] <sup>-</sup>  | 277.4                | 58.7                 | 10                      | -80                            | -24                      | -1                              |

|                                    |                                  |       |       |    |      |     |     |
|------------------------------------|----------------------------------|-------|-------|----|------|-----|-----|
|                                    | [M-H] <sup>-</sup>               |       |       |    |      |     |     |
| C20:0                              | Quantifier<br>[M-H] <sup>-</sup> | 311.4 | 311.3 | 10 | -90  | -14 | -9  |
|                                    | Qualifier<br>[M-H] <sup>-</sup>  | 311.4 | 182.8 | 10 | -90  | -50 | -11 |
| C20:4                              | Quantifier<br>[M-H] <sup>-</sup> | 303.4 | 303.2 | 10 | -80  | -12 | -11 |
|                                    | Qualifier<br>[M-H] <sup>-</sup>  | 303.4 | 259.2 | 10 | -80  | -20 | -7  |
| <i>d</i> <sub>5</sub> -C3:0        | IS<br>[M-H] <sup>-</sup>         | 78.1  | 78.0  | 10 | -55  | -6  | -5  |
| <sup>13</sup> C <sub>2</sub> -C6:0 | IS<br>[M-H] <sup>-</sup>         | 117.0 | 116.6 | 10 | -45  | -6  | -19 |
| <i>d</i> <sub>3</sub> -C12:0       | IS<br>[M-H] <sup>-</sup>         | 202.3 | 202.3 | 10 | -85  | -26 | -11 |
| <i>d</i> <sub>2</sub> -C18:1       | IS<br>[M-H] <sup>-</sup>         | 283.4 | 283.3 | 10 | -110 | -18 | -9  |
| <i>d</i> <sub>3</sub> -C18:0       | IS<br>[M-H] <sup>-</sup>         | 286.3 | 286.3 | 10 | -115 | -16 | -19 |
| <i>d</i> <sub>3</sub> -C20:0       | IS<br>[M-H] <sup>-</sup>         | 314.5 | 314.3 | 10 | -130 | -16 | -15 |
