# Supplementary material for: Degradation of brown adipocyte purine nucleotides regulates uncoupling protein 1 activity
Source: PubMed Central journal article supplement — Mol Metab. 2017 Dec 26;8:77–85. doi: 10.1016/j.molmet.2017.12.010 (PMC5985227; doi:10.1016/j.molmet.2017.12.010), 2017-12-26
Supplement: mmc2.pdf [file mmc2.pdf]

**Supplemental Table 1 – Free fatty acid amounts in cellular extracts.** These data are graphically shown in Figure 2 of the manuscript. Provided are mean metabolite amounts per cell number (nmol/mg DNA) ± SD, n=4. iBA – immortalized brown adipocytes, low – below detection limit, iso – treated with 10µM isoproterenol for 1h.

| cell  | treatment | nmol/mg DNA |     |       |      |       |      |        |       |       |       |       |      |       |     |
|-------|-----------|-------------|-----|-------|------|-------|------|--------|-------|-------|-------|-------|------|-------|-----|
|       |           | C12:0       |     | C14:0 |      | C15:0 |      | C16:0  |       | C16:1 |       | C18:1 |      | C18:2 |     |
|       |           | mean        | SD  | mean  | SD   | mean  | SD   | mean   | SD    | mean  | SD    | mean  | SD   | mean  | SD  |
| iBA   | control   | 1,0         | 0,3 | 6,9   | 2,0  | 13,7  | 2,7  | 147,0  | 19,3  | 85,9  | 13,2  | 94,3  | 11,1 | 3,7   | 0,4 |
| iBA   | iso       | 4,2         | 0,9 | 229,7 | 16,8 | 292,2 | 67,4 | 1691,1 | 104,2 | 665,9 | 114,2 | 584,2 | 79,3 | 20,5  | 1,9 |
| 3T3L1 | control   | 0,5         | 0,3 | low   | low  | 7,2   | 0,8  | 68,0   | 10,6  | 30,3  | 5,9   | 24,5  | 5,0  | 1,6   | 0,2 |
| 3T3L1 | iso       | 0,4         | 0,6 | 1,3   | 0,7  | 22,4  | 2,8  | 111,5  | 12,8  | 53,1  | 3,1   | 35,5  | 1,8  | 2,9   | 0,4 |
| C2C12 | control   | 1,7         | 1,1 | low   | low  | low   | low  | 89,4   | 21,9  | 42,8  | 8,2   | 74,7  | 11,3 | 12,3  | 2,8 |
| C2C12 | iso       | 1,7         | 0,5 | low   | low  | low   | low  | 109,4  | 23,3  | 39,1  | 3,5   | 73,1  | 5,4  | 13,3  | 0,6 |

**Supplemental Table 2 – Purine nucleotide metabolites and cations in cellular extracts.** These data are graphically shown in Figures 3,5 and 6 of the manuscript. Provided are mean metabolite amounts per cell number (nmol/mg DNA) ± SD, n=4 (3 for primary BA and HEK). iBA – immortalized brown adipocytes, primary BA – primary brown adipocytes, HEK – HEK293, HEK-UCP1 – HEK293 stably overexpressing UCP1, mock/GMPR – transiently transfected with mock or GMPR expression vector, low – below detection limit, n.d. – not determined, iso – treated with 10µM isoproterenol for 1h.

| cell       | treatment | nmol/mg DNA |       |       |       |       |       |       |       |       |       |       |       |       |              |       |          |       |      |         |       |           |       |           |      |         |       |       |       |       |
|------------|-----------|-------------|-------|-------|-------|-------|-------|-------|-------|-------|-------|-------|-------|-------|--------------|-------|----------|-------|------|---------|-------|-----------|-------|-----------|------|---------|-------|-------|-------|-------|
|            |           | ATP         |       | ADP   |       | AMP   |       | GTP   |       | GDP   |       | GMP   |       | IMP   | hypoxanthine |       | xanthine | urate |      | inosine |       | guanosine |       | magnesium |      | calcium |       |       |       |       |
|            |           | mean        | SD    | mean  | SD    | mean  | SD    | mean  | SD    | mean  | SD    | mean  | SD    | mean  | SD           | mean  | SD       | mean  | SD   | mean    | SD    | mean      | SD    | mean      | SD   | mean    | SD    | mean  | SD    |       |
| iBA        | control   | 959         | 116,4 | 172,3 | 18,2  | 36,9  | 4,6   | 349,5 | 230,4 | 73,6  | 8,7   | 20,6  | 2,1   | 13,2  | 2,1          | 33,9  | 20,8     | 39,3  | 10,5 | 585,6   | 197,7 | 34,2      | 16,7  | 5,4       | 1,5  | 3837    | 388,9 | 638   | 195,9 |       |
| iBA        | iso       | 532         | 52,7  | 128,6 | 9,4   | 38,9  | 4,0   | 232,8 | 101,0 | 74,6  | 5,7   | 27,0  | 2,8   | 43,9  | 7,0          | 101,3 | 14,4     | 91,4  | 18,2 | 370,1   | 70,4  | 117,6     | 26,5  | 19,9      | 2,1  | 5889    | 3818  | 10526 | 8532  |       |
| 3T3L1      | control   | 2429        | 447,0 | 264,5 | 47,0  | 40,1  | 9,5   | 379,2 | 82,0  | 101,1 | 20,2  | 12,8  | 2,4   | 37,5  | 10,8         | 56,2  | 13,1     | 42,0  | 7,3  | 66,7    | 37,2  | 83,0      | 15,7  | 17,7      | 4,9  | 4822    | 1011  | low   | low   |       |
| 3T3L1      | iso       | 2061        | 195,3 | 375,3 | 50,8  | 84,7  | 11,4  | 303,4 | 42,2  | 128,2 | 8,7   | 32,6  | 0,3   | 36,5  | 5,9          | 34,5  | 8,7      | 23,2  | 2,9  | 32,4    | 10,7  | 31,7      | 9,6   | 4,5       | 1,1  | 4689    | 177   | low   | low   |       |
| C2C12      | control   | 5805        | 829,6 | 417,3 | 60,8  | 49,6  | 6,7   | 732,3 | 179,8 | 101,6 | 13,1  | 6,7   | 32,6  | 1,9   | 41,9         | 33,8  | 61,4     | 13,6  | 0,0  | 0,0     | 42,4  | 44,8      | 166,3 | 47,0      | 15,1 | 2,8     | 10386 | 2091  | 523   | 360,9 |
| C2C12      | iso       | 6002        | 876,5 | 419,6 | 25,1  | 48,8  | 6,4   | 680,4 | 76,2  | 103,0 | 18,2  | 7,6   | 2,0   | 15,2  | 3,6          | 57,8  | 11,8     | 0,0   | 0,0  | 46,8    | 23,4  | 162,1     | 45,2  | 13,8      | 4,3  | 11396   | 825   | 1580  | 1067  |       |
| primary BA | control   | 575         | 95,1  | 217,6 | 54,8  | 81,7  | 43,1  | 137,1 | 23,2  | 87,2  | 24,6  | 13,1  | 4,9   | 145,6 | 54,8         | 2,9   | 1,0      | 0,6   | 0,7  | 310,0   | 123,5 | 19,9      | 9,7   | 1,2       | 1,0  | n.d.    | n.d.  | n.d.  | n.d.  |       |
| primary BA | iso       | 202         | 68,3  | 171,0 | 52,6  | 85,2  | 16,1  | 83,8  | 26,8  | 79,6  | 16,9  | 34,5  | 8,2   | 151,3 | 39,6         | 8,0   | 2,2      | 1,2   | 0,7  | 482,0   | 50,6  | 12,1      | 6,1   | 2,3       | 1,2  | n.d.    | n.d.  | n.d.  | n.d.  |       |
| HEK        | mock      | 1121        | 69,61 | 55,09 | 7,887 | 11,22 | 0,961 | 214,5 | 7,974 | 10,29 | 0,178 | 1,738 | 0,055 | n.d.  | n.d.         | n.d.  | n.d.     | n.d.  | n.d. | n.d.    | n.d.  | n.d.      | n.d.  | n.d.      | n.d. | n.d.    | n.d.  | n.d.  | n.d.  | n.d.  |
| HEK        | GMPR      | 1161        | 183,9 | 44,07 | 6,232 | 9,046 | 1,111 | 195   | 17,83 | 9,426 | 0,838 | 1,509 | 0,217 | n.d.  | n.d.         | n.d.  | n.d.     | n.d.  | n.d. | n.d.    | n.d.  | n.d.      | n.d.  | n.d.      | n.d. | n.d.    | n.d.  | n.d.  | n.d.  | n.d.  |
| HEK-UCP1   | mock      | 1086        | 100,7 | 61,18 | 8,997 | 7,744 | 1,262 | 369,8 | 61,26 | 15,83 | 1,621 | 0,886 | 0,064 | n.d.  | n.d.         | n.d.  | n.d.     | n.d.  | n.d. | n.d.    | n.d.  | n.d.      | n.d.  | n.d.      | n.d. | n.d.    | n.d.  | n.d.  | n.d.  | n.d.  |
| HEK-UCP1   | GMPR      | 842,4       | 90,47 | 56,16 | 7,239 | 10,25 | 2,308 | 170,7 | 26,98 | 17,03 | 1,125 | 1,228 | 0,177 | n.d.  | n.d.         | n.d.  | n.d.     | n.d.  | n.d. | n.d.    | n.d.  | n.d.      | n.d.  | n.d.      | n.d. | n.d.    | n.d.  | n.d.  | n.d.  | n.d.  |

**Supplemental Table 3 – Purine nucleotide metabolites in supernatants.** These data are graphically shown in Figure 4 of the manuscript. Provided are mean metabolite amounts per cell number (nmol/mg DNA) ± SD, n=4. iBA – immortalized brown adipocytes, low – below detection limit, n.d. – not determined, iso – treated with 10µM isoproterenol for 1h.

| cell  | treatment | nmol/mg DNA |     |      |      |       |      |      |     |      |      |      |      |      |              |       |          |       |       |         |       |           |        |      |      |
|-------|-----------|-------------|-----|------|------|-------|------|------|-----|------|------|------|------|------|--------------|-------|----------|-------|-------|---------|-------|-----------|--------|------|------|
|       |           | ATP         |     | ADP  |      | AMP   |      | GTP  |     | GDP  |      | GMP  |      | IMP  | hypoxanthine |       | xanthine | urate |       | inosine |       | guanosine |        |      |      |
|       |           | mean        | SD  | mean | SD   | mean  | SD   | mean | SD  | mean | SD   | mean | SD   | mean | SD           | mean  | SD       | mean  | SD    | mean    | SD    | mean      | SD     |      |      |
| iBA   | control   | low         | low | low  | low  | 0,42  | 0,19 | low  | low | low  | low  | low  | low  | low  | low          | low   | low      | low   | low   | low     | low   | low       | low    |      |      |
| iBA   | iso       | low         | low | 1,25 | 0,09 | 4,99  | 0,60 | low  | low | low  | low  | 1,35 | 0,21 | low  | low          | 44,65 | 27,09    | 13,04 | 23,71 | 56,27   | 13,93 | 9,97      | 17,74  | 1,22 | 0,95 |
| 3T3L1 | control   | low         | low | 2,27 | 0,77 | 7,09  | 2,64 | low  | low | 1,50 | 0,17 | 1,12 | 0,55 | low  | low          | 4,48  | 1,36     | low   | low   | low     | low   | low       | low    | 0,26 | 0,52 |
| 3T3L1 | iso       | low         | low | 1,97 | 0,69 | 5,79  | 1,23 | low  | low | 1,32 | 0,40 | 0,71 | 0,29 | low  | low          | 16,60 | 14,27    | 5,40  | 10,81 | 37,48   | 6,40  | 3,26      | 5,40   | 1,31 | 1,43 |
| C2C12 | control   | low         | low | 8,00 | 1,80 | 15,63 | 4,11 | low  | low | 2,86 | 0,30 | 2,15 | 0,87 | low  | low          | 25,67 | 6,41     | low   | low   | low     | low   | 7,45      | 1,32   | 1,93 | 0,47 |
| C2C12 | iso       | low         | low | 9,48 | 1,65 | 23,53 | 6,35 | low  | low | 4,37 | 0,94 | 2,62 | 1,15 | low  | low          | 30,83 | 8,10     | low   | low   | 10,83   | 7,38  | 79,35     | 137,43 | 4,66 | 5,16 |

**Supplemental Table 4 – Sequence of primers used in quantitative transcript detection as shown in Figure1.** The geometric mean of abundance of the upper five target transcripts served as normalizer for the eight lower transcripts.

| Target | forward primer             | reverse primer                 |
|--------|----------------------------|--------------------------------|
| Eef2   | ACCTGCCTGTCAATGAGTCC       | CAGCATGTGGCAGTATCAGG           |
| TF2B   | TGG AGA TTT GTC CAC CAT GA | GAA TTG CCA AAC TCA TCA AAA CT |
| Aktb   | CACCACACCTTCTACAATGA       | GTACGACCAGAGGCATACAG           |
| Hsp90  | AGGAGGGTCAAGGAAGTGGT       | TTTTTCTTGTCTTTGCCGCT           |
| TBP    | ACTTCACATCACAGCTCCCC       | CTTCGTGCAAGAAATGCTGA           |
| Gmpr   | GAGCTCAGACACAGCCATGA       | ACTCGGCTCAACACTGAGGT           |
| Ampd1  | CAGAGCCTCGCTTATCCATC       | ATTCTCCAGCATCTTTCCGA           |
| Gda    | GGAATTTGATGCCCTCTTGA       | GAGCTGGAGAATGGAACGAC           |
| Ada    | AAGGAACTTCTGGAACGGCT       | TCCAAGGTCTGGAAGGAATG           |
| Impdh1 | AAAGCCTATCTGTCCTGCGA       | AGTTCTGGAGGGAGGCTGTT           |
| Gmps   | ACACCTGGCAATGAGATTCC       | GGGGGCTTTGAAGTTAGGTC           |
| Adsl   | GTTTGCTGAAGCGTTTCTC        | CCATTGCCATGATGATGTTT           |
| Adss   | GAGTACCTGTCAACGCACA        | ACGCCAGCTGAAAACCTATT           |
